# Supplementary material for: β-Carbolines norharman and harman change neurobehavior causing neurological damage inCaenorhabditis elegans
Source: Royal Society of Chemistry journal article supplement (doi:10.1039/d3fo03732k), 2023-01-01
Supplement: d3fo03732k1.pdf [file d3fo03732k1.pdf]

## 1. LC<sub>50</sub> after acute exposure

| Norharman   |               | Harman      |               |
|-------------|---------------|-------------|---------------|
| Dose (mg/L) | Mortality (%) | Dose (mg/L) | Mortality (%) |
| 0.00        | 1.64          | 0.00        | 0.00          |
| 5.00        | 5.00          | 5.00        | 1.64          |
| 40.00       | 21.88         | 10.00       | 1.67          |
| 50.00       | 23.44         | 50.00       | 8.62          |
| 70.00       | 63.89         | 100.00      | 13.33         |
| 80.00       | 71.43         | 150.00      | 46.67         |
| 100.00      | 84.85         | 200.00      | 67.69         |

## 2. Physiological indicators

### 2.1 Body length after 24 h and 6 d

| Norharman            |        |        |        |                    |        |       |       | Harman               |        |       |        |                    |        |        |       |
|----------------------|--------|--------|--------|--------------------|--------|-------|-------|----------------------|--------|-------|--------|--------------------|--------|--------|-------|
| 24 hours (% control) |        |        |        | 6 days (% control) |        |       |       | 24 hours (% control) |        |       |        | 6 days (% control) |        |        |       |
| Control              | 0.05   | 5      | 10     | Control            | 0.05   | 5     | 10    | Control              | 0.05   | 5     | 10     | Control            | 0.05   | 5      | 10    |
| 100.38               | 116.52 | 91.51  | 110.09 | 92.20              | 111.36 | 76.91 | 96.15 | 101.46               | 91.75  | 86.71 | 87.58  | 108.17             | 98.82  | 96.52  | 90.73 |
| 116.33               | 88.34  | 101.89 | 104.67 | 94.61              | 100.93 | 78.61 | 70.76 | 92.61                | 84.20  | 85.30 | 76.60  | 96.30              | 94.00  | 90.17  | 94.45 |
| 103.35               | 92.71  | 95.22  | 103.98 | 103.41             | 103.54 | 89.67 | 88.23 | 111.33               | 75.12  | 84.36 | 89.57  | 91.62              | 96.37  | 100.54 | 87.08 |
| 117.41               | 119.59 | 90.79  | 93.12  | 97.32              | 100.34 | 85.69 | 80.25 | 91.56                | 101.26 | 78.26 | 75.08  | 110.10             | 101.82 | 86.64  | 70.99 |
| 117.97               | 123.02 | 92.68  | 79.60  | 95.19              | 101.48 | 82.03 | 82.89 | 95.51                | 94.80  | 83.17 | 100.38 | 105.85             | 93.86  | 67.66  | 77.31 |
| 101.34               | 120.17 | 83.95  | 78.87  | 107.12             | 99.51  | 88.96 | 75.02 | 84.17                | 98.12  | 76.00 | 89.57  | 103.67             | 90.04  | 73.51  | 81.89 |
| 110.21               | 96.95  | 101.99 | 77.85  | 89.36              | 104.06 | 93.65 | 87.96 | 100.84               | 105.00 | 98.51 | 84.86  | 94.91              | 80.59  | 79.91  | 89.31 |
| 99.21                | 99.71  | 110.94 | 92.80  | 97.08              | 96.63  | 83.96 | 99.34 | 82.86                | 106.04 | 75.12 | 78.12  | 80.83              | 87.02  | 81.32  | 75.80 |
| 94.53                | 95.49  | 103.07 | 92.84  | 101.10             | 99.47  | 95.82 | 86.46 | 88.47                | 103.23 | 85.87 | 92.96  | 92.23              | 91.50  | 69.94  | 79.84 |
| 115.23               | 114.28 | 110.59 | 98.78  | 99.78              | 114.56 | 99.66 | 80.12 | 84.62                | 112.87 | 87.54 | 81.09  | 99.21              | 98.55  | 90.61  | 85.55 |
| 111.19               | 108.41 | 104.56 | 93.86  | 94.74              | 100.58 | 92.44 | 80.62 | 91.54                | 76.77  | 88.13 | 82.35  | 99.67              | 99.35  | 94.40  | 83.48 |
| 105.40               | 102.35 | 107.33 | 80.55  | 106.94             | 93.98  | 86.38 | 75.57 | 107.71               | 83.77  | 78.07 | 90.69  | 101.67             | 99.02  | 94.75  | 65.23 |
| 88.65                | 106.68 | 110.16 | 83.08  | 103.07             | 102.52 | 81.86 | 87.43 | 109.85               | 97.56  | 73.69 | 90.66  | 100.38             | 94.06  | 96.15  | 85.33 |
| 84.86                | 110.96 | 93.12  | 78.86  | 102.17             | 105.68 | 89.67 | 88.73 | 99.38                | 112.83 | 89.47 | 77.42  | 99.16              | 90.11  | 87.24  | 87.63 |
| 96.79                | 116.80 | 101.67 | 89.26  | 103.07             | 109.20 | 93.47 | 69.45 | 108.90               | 108.56 | 83.23 | 82.99  | 101.77             | 96.16  | 94.76  | 95.57 |
| 81.57                | 111.77 | 83.05  | 89.20  | 97.59              | 108.68 | 84.24 | 81.16 | 104.16               | 90.41  | 74.63 | 78.63  | 94.21              | 89.31  | 92.29  | 91.87 |
| 80.19                | 111.49 | 108.54 | 108.40 | 105.77             | 101.67 | 81.82 | 72.03 | 104.69               | 77.29  | 80.64 | 85.16  | 102.57             | 93.56  | 74.00  | 84.17 |
| 78.35                | 103.63 | 104.86 | 102.31 | 101.08             | 104.67 | 91.79 | 81.98 | 107.47               | 102.87 | 77.60 | 84.05  | 109.42             | 105.98 | 97.95  | 76.78 |
| 78.92                | 114.44 | 97.49  | 102.06 | 105.30             | 110.70 | 67.68 | 84.77 | 116.18               | 104.40 | 81.52 | 92.07  | 106.75             | 92.78  | 88.36  | 75.72 |
| 118.12               | 100.22 | 113.01 | 103.95 | 103.10             | 106.59 | 95.42 | 77.81 | 116.69               | 101.52 | 86.04 | 86.41  | 101.51             | 90.80  | 90.39  | 76.57 |

## 2.2 Body width after 24 h and 6 d

| Norharman            |        |        |       |                    |        |        |        | Harman               |        |        |        |                    |        |        |       |
|----------------------|--------|--------|-------|--------------------|--------|--------|--------|----------------------|--------|--------|--------|--------------------|--------|--------|-------|
| 24 hours (% control) |        |        |       | 6 days (% control) |        |        |        | 24 hours (% control) |        |        |        | 6 days (% control) |        |        |       |
| Control              | 0.05   | 5      | 10    | Control            | 0.05   | 5      | 10     | Control              | 0.05   | 5      | 10     | Control            | 0.05   | 5      | 10    |
| 111.58               | 109.88 | 78.38  | 85.23 | 79.74              | 108.09 | 59.86  | 105.24 | 95.16                | 84.11  | 94.40  | 84.11  | 112.44             | 104.66 | 82.84  | 86.93 |
| 114.80               | 83.12  | 86.28  | 91.67 | 87.26              | 90.19  | 76.05  | 70.62  | 99.09                | 81.04  | 91.76  | 83.55  | 89.04              | 119.87 | 115.08 | 92.85 |
| 105.55               | 80.98  | 97.99  | 90.00 | 109.62             | 100.81 | 84.52  | 112.79 | 111.66               | 73.45  | 76.45  | 96.22  | 94.87              | 98.74  | 91.94  | 86.37 |
| 126.83               | 122.53 | 72.46  | 75.62 | 105.51             | 120.27 | 72.94  | 91.32  | 88.36                | 95.92  | 83.18  | 87.34  | 104.03             | 116.65 | 97.13  | 72.07 |
| 120.01               | 115.76 | 83.18  | 76.12 | 96.36              | 95.80  | 82.30  | 99.76  | 77.54                | 102.82 | 73.61  | 97.24  | 97.13              | 87.03  | 64.55  | 75.69 |
| 109.62               | 109.97 | 89.15  | 68.80 | 100.10             | 91.35  | 103.21 | 96.96  | 85.23                | 113.41 | 73.68  | 96.22  | 115.46             | 85.26  | 66.43  | 63.92 |
| 117.96               | 89.88  | 92.58  | 95.59 | 81.09              | 99.89  | 92.03  | 106.46 | 91.40                | 117.66 | 100.57 | 83.51  | 103.08             | 84.32  | 98.58  | 79.72 |
| 88.65                | 114.51 | 83.30  | 84.58 | 101.29             | 98.04  | 86.10  | 103.32 | 85.66                | 118.16 | 98.06  | 85.39  | 70.09              | 79.12  | 90.40  | 79.00 |
| 111.14               | 97.32  | 87.63  | 91.20 | 103.13             | 98.62  | 109.33 | 105.64 | 81.67                | 105.79 | 84.11  | 87.34  | 82.84              | 100.94 | 77.93  | 72.76 |
| 104.96               | 105.84 | 86.05  | 64.53 | 87.26              | 105.51 | 93.48  | 78.90  | 85.39                | 103.94 | 81.83  | 101.17 | 95.68              | 106.11 | 71.47  | 75.47 |
| 113.16               | 113.66 | 88.65  | 72.08 | 98.73              | 103.40 | 97.65  | 108.01 | 69.66                | 74.90  | 78.23  | 82.92  | 94.02              | 102.80 | 89.07  | 84.10 |
| 119.92               | 107.24 | 82.83  | 81.86 | 104.61             | 118.24 | 91.82  | 80.69  | 95.92                | 73.68  | 81.04  | 103.21 | 95.15              | 108.85 | 85.26  | 65.68 |
| 88.21                | 94.01  | 91.38  | 83.44 | 114.84             | 112.73 | 77.79  | 118.82 | 114.60               | 102.98 | 79.92  | 91.10  | 98.74              | 112.12 | 87.56  | 74.65 |
| 94.45                | 92.46  | 63.09  | 59.96 | 108.54             | 115.98 | 82.43  | 84.67  | 89.68                | 99.91  | 94.73  | 83.18  | 94.24              | 119.36 | 75.72  | 83.03 |
| 82.83                | 113.16 | 88.51  | 75.24 | 114.84             | 107.99 | 98.31  | 66.11  | 103.87               | 99.88  | 89.91  | 80.25  | 115.58             | 117.41 | 86.37  | 81.30 |
| 72.99                | 117.14 | 69.94  | 71.15 | 102.55             | 79.45  | 81.91  | 98.07  | 124.63               | 110.01 | 76.45  | 79.36  | 90.80              | 113.51 | 85.80  | 91.31 |
| 85.37                | 109.62 | 105.55 | 86.66 | 105.88             | 88.37  | 96.52  | 67.77  | 139.67               | 72.56  | 69.82  | 88.56  | 128.62             | 105.07 | 78.93  | 78.18 |
| 63.04                | 99.78  | 91.23  | 85.37 | 101.39             | 96.25  | 101.39 | 96.81  | 132.74               | 109.05 | 89.55  | 91.20  | 125.66             | 115.24 | 86.37  | 72.89 |
| 102.18               | 110.58 | 88.77  | 88.54 | 93.03              | 102.29 | 74.23  | 103.40 | 121.13               | 129.28 | 76.62  | 89.19  | 89.89              | 85.39  | 87.97  | 67.35 |
| 66.75                | 91.67  | 83.76  | 82.83 | 104.22             | 107.06 | 96.36  | 85.04  | 106.94               | 96.94  | 86.38  | 79.82  | 102.64             | 99.12  | 83.34  | 79.12 |

2.3 Head thrashes after 24 h and 6 d

| Norharman            |      |     |    |                    |      |    |    | Harman               |      |    |    |                    |      |    |    |
|----------------------|------|-----|----|--------------------|------|----|----|----------------------|------|----|----|--------------------|------|----|----|
| 24 hours (times/min) |      |     |    | 6 days (times/min) |      |    |    | 24 hours (times/min) |      |    |    | 6 days (times/min) |      |    |    |
| Control              | 0.05 | 5   | 10 | Control            | 0.05 | 5  | 10 | Control              | 0.05 | 5  | 10 | Control            | 0.05 | 5  | 10 |
| 91                   | 90   | 91  | 96 | 94                 | 84   | 75 | 56 | 91                   | 80   | 76 | 60 | 94                 | 104  | 58 | 60 |
| 93                   | 90   | 95  | 90 | 103                | 100  | 77 | 30 | 93                   | 96   | 53 | 58 | 103                | 90   | 55 | 54 |
| 92                   | 103  | 101 | 88 | 98                 | 90   | 50 | 26 | 92                   | 84   | 55 | 50 | 98                 | 98   | 70 | 40 |
| 102                  | 85   | 88  | 89 | 105                | 79   | 59 | 20 | 102                  | 60   | 72 | 46 | 105                | 96   | 66 | 42 |
| 96                   | 102  | 82  | 87 | 99                 | 82   | 66 | 16 | 96                   | 66   | 59 | 62 | 99                 | 88   | 62 | 58 |
| 90                   | 99   | 93  | 86 | 96                 | 77   | 51 | 34 | 90                   | 88   | 53 | 57 | 96                 | 90   | 60 | 64 |
| 93                   | 93   | 90  | 90 | 98                 | 70   | 48 | 12 | 93                   | 76   | 55 | 61 | 98                 | 88   | 42 | 56 |
| 112                  | 87   | 80  | 78 | 102                | 62   | 42 | 10 | 112                  | 82   | 58 | 40 | 102                | 85   | 45 | 32 |
| 86                   | 90   | 85  | 80 | 92                 | 78   | 50 | 8  | 86                   | 66   | 56 | 69 | 92                 | 80   | 50 | 45 |
| 105                  | 92   | 91  | 89 | 99                 | 80   | 53 | 7  | 105                  | 70   | 46 | 42 | 99                 | 82   | 44 | 40 |
| 113                  | 90   | 92  | 90 | 88                 | 80   | 70 | 40 | 113                  | 88   | 64 | 48 | 88                 | 82   | 66 | 28 |
| 90                   | 96   | 88  | 86 | 95                 | 90   | 54 | 19 | 90                   | 98   | 57 | 68 | 95                 | 85   | 54 | 32 |
| 96                   | 102  | 82  | 82 | 80                 | 78   | 43 | 18 | 96                   | 70   | 70 | 47 | 80                 | 90   | 50 | 42 |
| 106                  | 98   | 89  | 78 | 100                | 70   | 50 | 22 | 106                  | 60   | 58 | 41 | 100                | 78   | 46 | 41 |
| 80                   | 99   | 95  | 80 | 90                 | 72   | 44 | 15 | 80                   | 66   | 69 | 40 | 90                 | 88   | 68 | 30 |

2.4 Body bends after 24 h and 6 d

| Norharman             |      |    |    |                     |      |    |    | Harman                |      |    |    |                     |      |    |    |
|-----------------------|------|----|----|---------------------|------|----|----|-----------------------|------|----|----|---------------------|------|----|----|
| 24 hours (times/20 s) |      |    |    | 6 days (times/20 s) |      |    |    | 24 hours (times/20 s) |      |    |    | 6 days (times/20 s) |      |    |    |
| Control               | 0.05 | 5  | 10 | Control             | 0.05 | 5  | 10 | Control               | 0.05 | 5  | 10 | Control             | 0.05 | 5  | 10 |
| 36                    | 33   | 32 | 29 | 33                  | 29   | 23 | 20 | 36                    | 39   | 24 | 31 | 33                  | 38   | 32 | 18 |
| 34                    | 35   | 34 | 28 | 28                  | 22   | 22 | 26 | 34                    | 30   | 21 | 30 | 28                  | 30   | 27 | 15 |
| 39                    | 29   | 36 | 30 | 34                  | 32   | 28 | 12 | 39                    | 34   | 17 | 27 | 34                  | 29   | 24 | 12 |
| 39                    | 40   | 33 | 32 | 27                  | 24   | 20 | 10 | 39                    | 35   | 24 | 31 | 27                  | 31   | 21 | 11 |
| 42                    | 36   | 39 | 30 | 34                  | 35   | 11 | 14 | 42                    | 33   | 20 | 28 | 34                  | 25   | 18 | 8  |
| 39                    | 42   | 38 | 30 | 29                  | 30   | 25 | 11 | 39                    | 36   | 29 | 36 | 29                  | 25   | 25 | 17 |
| 31                    | 36   | 30 | 31 | 30                  | 31   | 18 | 3  | 31                    | 38   | 24 | 34 | 30                  | 25   | 22 | 8  |
| 37                    | 36   | 37 | 30 | 28                  | 25   | 24 | 5  | 37                    | 34   | 34 | 30 | 28                  | 27   | 21 | 9  |
| 36                    | 35   | 35 | 35 | 33                  | 20   | 17 | 4  | 36                    | 32   | 30 | 25 | 33                  | 22   | 20 | 20 |
| 33                    | 32   | 35 | 36 | 39                  | 28   | 20 | 14 | 33                    | 27   | 32 | 22 | 39                  | 15   | 18 | 10 |
| 40                    | 32   | 35 | 33 | 33                  | 30   | 22 | 19 | 40                    | 37   | 30 | 38 | 33                  | 26   | 28 | 16 |
| 30                    | 33   | 37 | 30 | 30                  | 28   | 27 | 9  | 30                    | 28   | 29 | 29 | 30                  | 10   | 22 | 18 |
| 33                    | 30   | 32 | 32 | 32                  | 32   | 16 | 20 | 33                    | 35   | 31 | 28 | 32                  | 14   | 20 | 11 |
| 24                    | 34   | 34 | 29 | 38                  | 29   | 20 | 8  | 24                    | 25   | 30 | 34 | 38                  | 12   | 24 | 8  |
| 29                    | 36   | 30 | 31 | 28                  | 26   | 10 | 6  | 29                    | 32   | 33 | 30 | 28                  | 10   | 12 | 10 |

## 2.5 pharyngeal pumping after 24 h and 6 d

| Norharman             |      |    |    |                     |      |    |    | Harman                |      |    |    |                     |      |    |    |
|-----------------------|------|----|----|---------------------|------|----|----|-----------------------|------|----|----|---------------------|------|----|----|
| 24 hours (times/20 s) |      |    |    | 6 days (times/20 s) |      |    |    | 24 hours (times/20 s) |      |    |    | 6 days (times/20 s) |      |    |    |
| Control               | 0.05 | 5  | 10 | Control             | 0.05 | 5  | 10 | Control               | 0.05 | 5  | 10 | Control             | 0.05 | 5  | 10 |
| 28                    | 33   | 28 | 26 | 22                  | 20   | 19 | 15 | 31                    | 26   | 30 | 24 | 26                  | 22   | 18 | 12 |
| 27                    | 28   | 26 | 28 | 18                  | 21   | 21 | 11 | 30                    | 32   | 32 | 22 | 24                  | 20   | 20 | 13 |
| 28                    | 25   | 27 | 25 | 19                  | 18   | 21 | 13 | 28                    | 30   | 26 | 25 | 25                  | 19   | 16 | 15 |
| 30                    | 27   | 24 | 27 | 23                  | 15   | 20 | 14 | 29                    | 29   | 27 | 27 | 28                  | 20   | 17 | 14 |
| 31                    | 26   | 32 | 28 | 21                  | 16   | 19 | 15 | 30                    | 27   | 23 | 28 | 22                  | 21   | 22 | 17 |
| 30                    | 34   | 24 | 23 | 17                  | 19   | 22 | 11 | 24                    | 28   | 29 | 23 | 27                  | 18   | 15 | 18 |
| 32                    | 33   | 26 | 30 | 18                  | 20   | 20 | 10 | 34                    | 24   | 27 | 21 | 24                  | 20   | 13 | 13 |
| 27                    | 30   | 30 | 26 | 20                  | 19   | 16 | 10 | 28                    | 27   | 28 | 28 | 22                  | 16   | 18 | 12 |
| 29                    | 36   | 23 | 24 | 15                  | 17   | 14 | 9  | 33                    | 29   | 30 | 22 | 21                  | 20   | 20 | 10 |
| 28                    | 33   | 24 | 27 | 19                  | 18   | 15 | 12 | 34                    | 31   | 25 | 24 | 23                  | 21   | 14 | 11 |
| 30                    | 25   | 25 | 25 | 15                  | 17   | 14 | 17 | 32                    | 23   | 29 | 30 | 25                  | 19   | 18 | 20 |
| 31                    | 29   | 27 | 24 | 21                  | 18   | 17 | 12 | 30                    | 27   | 25 | 23 | 27                  | 23   | 20 | 15 |
| 30                    | 31   | 24 | 22 | 20                  | 18   | 16 | 10 | 29                    | 29   | 27 | 25 | 20                  | 20   | 18 | 13 |
| 29                    | 34   | 26 | 25 | 19                  | 20   | 18 | 16 | 26                    | 28   | 24 | 24 | 28                  | 17   | 21 | 18 |
| 29                    | 28   | 31 | 23 | 20                  | 21   | 16 | 14 | 30                    | 32   | 26 | 28 | 23                  | 18   | 17 | 16 |

## 3. Foraging behavior and chemotaxis assay

### 3.1 Foraging behavior

| Norharman | Control (%) |       |       |       | 0.05 (%) |       |       |       | 5 (%) |       |       |       | 10 (%) |       |       |       |
|-----------|-------------|-------|-------|-------|----------|-------|-------|-------|-------|-------|-------|-------|--------|-------|-------|-------|
| 2 h       | 2.50        | 0.00  | 0.00  | 4.88  | 0.00     | 2.00  | 10.20 | 0.00  | 0.00  | 0.00  | 0.00  | 3.28  | 0.00   | 10.77 | 0.00  | 0.00  |
| 4 h       | 2.50        | 2.22  | 10.00 | 12.20 | 4.17     | 16.00 | 30.61 | 8.77  | 6.38  | 2.22  | 11.36 | 16.39 | 4.65   | 20.00 | 1.28  | 4.76  |
| 8 h       | 17.50       | 37.78 | 15.00 | 29.27 | 20.83    | 40.00 | 38.78 | 22.81 | 6.38  | 2.22  | 11.36 | 16.39 | 4.65   | 20.00 | 1.28  | 4.76  |
| 24 h      | 40.00       | 75.56 | 35.00 | 58.54 | 43.75    | 54.00 | 63.27 | 45.61 | 42.55 | 24.44 | 59.09 | 49.18 | 34.88  | 49.23 | 28.21 | 26.98 |

| Harman | Control (%) |       |       |       | 0.05 (%) |       |       |       | 5 (%) |       |       |       | 10 (%) |      |      |      |
|--------|-------------|-------|-------|-------|----------|-------|-------|-------|-------|-------|-------|-------|--------|------|------|------|
| 2 h    | 0.00        | 2.50  | 0.00  | 1.96  | 0.00     | 0.00  | 0.00  | 0.00  | 0.00  | 0.00  | 0.00  | 0.00  | 0.00   | 0.00 | 0.00 | 0.00 |
| 4 h    | 7.14        | 2.50  | 11.11 | 11.76 | 0.00     | 7.14  | 5.80  | 17.50 | 4.90  | 9.00  | 4.69  | 0.00  | 2.47   | 3.70 | 1.61 | 0.00 |
| 8 h    | 14.29       | 5.00  | 20.00 | 41.18 | 9.76     | 30.00 | 10.14 | 50.00 | 14.71 | 40.00 | 18.75 | 2.94  | 3.70   | 3.70 | 1.61 | 3.53 |
| 24 h   | 47.62       | 60.00 | 51.11 | 84.31 | 24.39    | 45.71 | 24.64 | 70.00 | 31.37 | 55.00 | 42.19 | 17.65 | 4.94   | 3.70 | 1.61 | 4.71 |

### 3.2 Chemotaxis index

| □       | Norharman |       |       |       | Harman |       |       |       |
|---------|-----------|-------|-------|-------|--------|-------|-------|-------|
| Control | -0.08     | -0.03 | -0.05 | -0.06 | -0.12  | -0.04 | -0.06 | -0.23 |
| 0.05    | -0.05     | -0.03 | -0.03 | -0.05 | -0.06  | -0.10 | -0.08 | -0.11 |
| 5       | 0.08      | 0.02  | 0.02  | 0.05  | 0.02   | -0.03 | 0.02  | 0.03  |
| 10      | -0.02     | 0.05  | -0.02 | 0.03  | 0.05   | 0.04  | 0.03  | 0.05  |

#### 4. Lifespan (Mortality)

| Acute exposure | Norharman (24 h) |      |   |    | ☐ Acute exposure | Harman (24 h) |      |   |    |
|----------------|------------------|------|---|----|------------------|---------------|------|---|----|
| time(days)     | Control          | 0.05 | 5 | 10 | time(days)       | Control       | 0.05 | 5 | 10 |
| 0              | ☐                | ☐    | ☐ | ☐  | 0                | ☐             | ☐    | ☐ | ☐  |
| 2              | ☐                | ☐    | ☐ | 1  | 2                | ☐             | ☐    | 1 | 1  |
| 7              | ☐                | 1    | ☐ | ☐  | 3                | ☐             | ☐    | ☐ | 1  |
| 8              | ☐                | 1    | 1 | ☐  | 8                | ☐             | ☐    | ☐ | 1  |
| 8              | ☐                | 1    | 1 | ☐  | 8                | ☐             | ☐    | ☐ | 1  |
| 8              | ☐                | 1    | 1 | ☐  | 8                | ☐             | ☐    | ☐ | ☐  |
| 9              | ☐                | ☐    | 1 | 1  | 8                | ☐             | ☐    | ☐ | ☐  |
| 9              | ☐                | ☐    | 1 | 1  | 9                | ☐             | ☐    | 1 | 1  |
| 9              | ☐                | ☐    | ☐ | 1  | 9                | ☐             | ☐    | 1 | 1  |
| 9              | ☐                | ☐    | ☐ | 1  | 9                | ☐             | ☐    | ☐ | 1  |
| 9              | ☐                | ☐    | ☐ | 1  | 9                | ☐             | ☐    | ☐ | 1  |
| 10             | 1                | 1    | 1 | 1  | 9                | ☐             | ☐    | ☐ | ☐  |
| 10             | 1                | 1    | ☐ | ☐  | 9                | ☐             | ☐    | ☐ | ☐  |
| 10             | ☐                | 1    | ☐ | ☐  | 10               | 1             | ☐    | 1 | 1  |
| 10             | ☐                | 1    | ☐ | ☐  | 10               | 1             | ☐    | ☐ | 1  |
| 11             | 1                | ☐    | 1 | 1  | 10               | ☐             | ☐    | ☐ | 1  |
| 11             | 1                | ☐    | 1 | 1  | 10               | ☐             | ☐    | ☐ | 1  |
| 11             | ☐                | ☐    | 1 | 1  | 10               | ☐             | ☐    | ☐ | 1  |
| 11             | ☐                | ☐    | 1 | 1  | 10               | ☐             | ☐    | ☐ | 1  |
| 11             | ☐                | ☐    | 1 | ☐  | 10               | ☐             | ☐    | ☐ | ☐  |
| 12             | 1                | 1    | 1 | 1  | 10               | ☐             | ☐    | ☐ | ☐  |
| 12             | ☐                | 1    | 1 | ☐  | 11               | 1             | ☐    | 1 | 1  |
| 12             | ☐                | 1    | ☐ | ☐  | 11               | 1             | ☐    | ☐ | 1  |
| 13             | 1                | 1    | 1 | ☐  | 11               | ☐             | ☐    | ☐ | 1  |
| 13             | 1                | 1    | 1 | ☐  | 11               | ☐             | ☐    | ☐ | ☐  |
| 13             | 1                | 1    | 1 | ☐  | 11               | ☐             | ☐    | ☐ | ☐  |
| 13             | 1                | 1    | ☐ | ☐  | 11               | ☐             | ☐    | ☐ | ☐  |
| 13             | 1                | 1    | ☐ | ☐  | 11               | ☐             | ☐    | ☐ | ☐  |
| 13             | 1                | 1    | ☐ | ☐  | 11               | ☐             | ☐    | ☐ | ☐  |
| 14             | ☐                | 1    | 1 | ☐  | 11               | ☐             | ☐    | ☐ | ☐  |
| 14             | ☐                | ☐    | 1 | ☐  | 11               | ☐             | ☐    | ☐ | ☐  |
| 15             | 1                | 1    | 1 | ☐  | 11               | ☐             | ☐    | ☐ | ☐  |
| 15             | 1                | 1    | ☐ | ☐  | 11               | ☐             | ☐    | ☐ | ☐  |
| 15             | 1                | 1    | ☐ | ☐  | 12               | 1             | 1    | 1 | 1  |
| 15             | ☐                | 1    | ☐ | ☐  | 12               | ☐             | 1    | 1 | 1  |
| 15             | ☐                | 1    | ☐ | ☐  | 12               | ☐             | 1    | 1 | ☐  |
| 15             | ☐                | 1    | ☐ | ☐  | 12               | ☐             | 1    | 1 | ☐  |
| 15             | ☐                | 1    | ☐ | ☐  | 12               | ☐             | 1    | 1 | ☐  |
| 17             | 1                | 1    | 1 | 1  | 12               | ☐             | 1    | 1 | ☐  |

|                          |                          |                          |                          |                          |    |                          |                          |                          |                          |
|--------------------------|--------------------------|--------------------------|--------------------------|--------------------------|----|--------------------------|--------------------------|--------------------------|--------------------------|
| 17                       | 1                        | 1                        | 1                        | 1                        | 13 | 1                        | 1                        | <input type="checkbox"/> | 1                        |
| 17                       | 1                        | 1                        | 1                        | <input type="checkbox"/> | 13 | 1                        | <input type="checkbox"/> | <input type="checkbox"/> | <input type="checkbox"/> |
| 17                       | 1                        | 1                        | 1                        | <input type="checkbox"/> | 13 | 1                        | <input type="checkbox"/> | <input type="checkbox"/> | <input type="checkbox"/> |
| 17                       | 1                        | 1                        | 1                        | <input type="checkbox"/> | 13 | 1                        | <input type="checkbox"/> | <input type="checkbox"/> | <input type="checkbox"/> |
| 17                       | 1                        | 1                        | 1                        | <input type="checkbox"/> | 13 | 1                        | <input type="checkbox"/> | <input type="checkbox"/> | <input type="checkbox"/> |
| 17                       | 1                        | 1                        | 1                        | <input type="checkbox"/> | 13 | 1                        | <input type="checkbox"/> | <input type="checkbox"/> | <input type="checkbox"/> |
| 17                       | <input type="checkbox"/> | 1                        | 1                        | <input type="checkbox"/> | 14 | <input type="checkbox"/> | 1                        | 1                        | 1                        |
| 17                       | <input type="checkbox"/> | 1                        | <input type="checkbox"/> | <input type="checkbox"/> | 14 | <input type="checkbox"/> | 1                        | 1                        | <input type="checkbox"/> |
| 17                       | <input type="checkbox"/> | 1                        | <input type="checkbox"/> | <input type="checkbox"/> | 15 | 1                        | <input type="checkbox"/> | 1                        | 1                        |
| 17                       | 0                        | 0                        | 0                        | 0                        | 15 | 1                        | <input type="checkbox"/> | <input type="checkbox"/> | 1                        |
| 17                       | 0                        | 0                        | 0                        | 0                        | 15 | 1                        | <input type="checkbox"/> | <input type="checkbox"/> | 1                        |
| <input type="checkbox"/> | 17 | 1                        | 1                        | 1                        | 1                        |
| <input type="checkbox"/> | 17 | 1                        | 1                        | 1                        | 1                        |
| <input type="checkbox"/> | 17 | 1                        | 1                        | 0                        | 1                        |
| <input type="checkbox"/> | 17 | 1                        | 1                        | 0                        | 0                        |
| <input type="checkbox"/> | 17 | 1                        | 1                        | 0                        | 0                        |
| <input type="checkbox"/> | 17 | 1                        | 1                        | 0                        | 0                        |
| <input type="checkbox"/> | 17 | 1                        | 1                        | 0                        | 0                        |
| <input type="checkbox"/> | 17 | 0                        | 1                        | 0                        | 0                        |
| <input type="checkbox"/> | 17 | 0                        | 0                        | 0                        | 0                        |

| Chronic exposure | Norharman (6 d)          |                          |                          |                          | Chronic exposure | Harman (6 d)             |                          |                          |                          |
|------------------|--------------------------|--------------------------|--------------------------|--------------------------|------------------|--------------------------|--------------------------|--------------------------|--------------------------|
| time(days)       | Control                  | 0.05                     | 5                        | 10                       | time(days)       | Control                  | 0.05                     | 5                        | 10                       |
| 0                | <input type="checkbox"/> | <input type="checkbox"/> | <input type="checkbox"/> | <input type="checkbox"/> | 0                | <input type="checkbox"/> | <input type="checkbox"/> | <input type="checkbox"/> | <input type="checkbox"/> |
| 3                | <input type="checkbox"/> | <input type="checkbox"/> | 1                        | 1                        | 2                | <input type="checkbox"/> | <input type="checkbox"/> | <input type="checkbox"/> | 1                        |
| 3                | <input type="checkbox"/> | <input type="checkbox"/> | 1                        | 1                        | 2                | <input type="checkbox"/> | <input type="checkbox"/> | <input type="checkbox"/> | 1                        |
| 3                | <input type="checkbox"/> | <input type="checkbox"/> | <input type="checkbox"/> | 1                        | 2                | <input type="checkbox"/> | <input type="checkbox"/> | <input type="checkbox"/> | <input type="checkbox"/> |
| 3                | <input type="checkbox"/> | <input type="checkbox"/> | <input type="checkbox"/> | 1                        | 3                | 1                        | <input type="checkbox"/> | <input type="checkbox"/> | 1                        |
| 4                | <input type="checkbox"/> | 1                        | 1                        | 1                        | 3                | 1                        | <input type="checkbox"/> | <input type="checkbox"/> | 1                        |
| 4                | <input type="checkbox"/> | 1                        | <input type="checkbox"/> | <input type="checkbox"/> | 3                | <input type="checkbox"/> | <input type="checkbox"/> | <input type="checkbox"/> | 1                        |
| 5                | 1                        | 1                        | 1                        | 1                        | 3                | <input type="checkbox"/> | <input type="checkbox"/> | <input type="checkbox"/> | 1                        |
| 7                | 1                        | 1                        | 1                        | 1                        | 4                | <input type="checkbox"/> | 1                        | 1                        | 1                        |
| 7                | <input type="checkbox"/> | 1                        | 1                        | <input type="checkbox"/> | 4                | <input type="checkbox"/> | 1                        | 1                        | <input type="checkbox"/> |
| 9                | 1                        | 1                        | 1                        | 1                        | 4                | <input type="checkbox"/> | 1                        | 1                        | <input type="checkbox"/> |
| 9                | 1                        | 1                        | 1                        | 1                        | 4                | <input type="checkbox"/> | <input type="checkbox"/> | 1                        | <input type="checkbox"/> |
| 9                | 1                        | 1                        | 1                        | 1                        | 5                | 1                        | 1                        | 1                        | 1                        |
| 9                | 1                        | 1                        | 1                        | 1                        | 5                | <input type="checkbox"/> | 1                        | 1                        | 1                        |
| 9                | 1                        | 1                        | 1                        | 1                        | 5                | <input type="checkbox"/> | 1                        | 1                        | <input type="checkbox"/> |
| 9                | 1                        | <input type="checkbox"/> | 1                        | 1                        | 5                | <input type="checkbox"/> | 1                        | <input type="checkbox"/> | <input type="checkbox"/> |
| 9                | 1                        | <input type="checkbox"/> | 1                        | 1                        | 6                | <input type="checkbox"/> | 1                        | 1                        | 1                        |
| 9                | <input type="checkbox"/> | <input type="checkbox"/> | 1                        | 1                        | 6                | <input type="checkbox"/> | 1                        | 1                        | 1                        |
| 9                | <input type="checkbox"/> | <input type="checkbox"/> | 1                        | 1                        | 6                | <input type="checkbox"/> | 1                        | 1                        | 1                        |

|    |                          |                          |                          |                          |   |                          |                          |                          |                          |
|----|--------------------------|--------------------------|--------------------------|--------------------------|---|--------------------------|--------------------------|--------------------------|--------------------------|
| 9  | <input type="checkbox"/> | <input type="checkbox"/> | 1                        | 1                        | 6 | <input type="checkbox"/> | 1                        | 1                        | 1                        |
| 9  | <input type="checkbox"/> | <input type="checkbox"/> | 1                        | <input type="checkbox"/> | 6 | <input type="checkbox"/> | 1                        | 1                        | 1                        |
| 9  | <input type="checkbox"/> | <input type="checkbox"/> | 1                        | <input type="checkbox"/> | 6 | <input type="checkbox"/> | <input type="checkbox"/> | 1                        | <input type="checkbox"/> |
| 10 | 1                        | 1                        | 1                        | 1                        | 6 | <input type="checkbox"/> | <input type="checkbox"/> | 1                        | <input type="checkbox"/> |
| 10 | 1                        | 1                        | 1                        | 1                        | 6 | <input type="checkbox"/> | <input type="checkbox"/> | 1                        | <input type="checkbox"/> |
| 10 | 1                        | 1                        | <input type="checkbox"/> | 1                        | 6 | <input type="checkbox"/> | <input type="checkbox"/> | 1                        | <input type="checkbox"/> |
| 10 | 1                        | 1                        | <input type="checkbox"/> | 1                        | 6 | <input type="checkbox"/> | <input type="checkbox"/> | <input type="checkbox"/> | <input type="checkbox"/> |
| 10 | 1                        | 1                        | <input type="checkbox"/> | <input type="checkbox"/> | 7 | 1                        | <input type="checkbox"/> | <input type="checkbox"/> | 1                        |
| 11 | 1                        | 1                        | 1                        | 0                        | 9 | 1                        | 1                        | 1                        | 1                        |
| 11 | 1                        | 1                        | 1                        | <input type="checkbox"/> | 9 | 1                        | 0                        | 1                        | 1                        |
| 11 | 1                        | 1                        | 0                        | <input type="checkbox"/> | 9 | 1                        | <input type="checkbox"/> | 0                        | 0                        |
| 11 | 1                        | 1                        | <input type="checkbox"/> | <input type="checkbox"/> | 9 | 1                        | <input type="checkbox"/> | <input type="checkbox"/> | <input type="checkbox"/> |
| 11 | 1                        | 1                        | <input type="checkbox"/> | <input type="checkbox"/> | 9 | 1                        | <input type="checkbox"/> | <input type="checkbox"/> | <input type="checkbox"/> |
| 11 | 1                        | 1                        | <input type="checkbox"/> | <input type="checkbox"/> | 9 | 1                        | <input type="checkbox"/> | <input type="checkbox"/> | <input type="checkbox"/> |
| 11 | 0                        | 0                        | 0                        | 0                        | 9 | 0                        | <input type="checkbox"/> | <input type="checkbox"/> | <input type="checkbox"/> |

## 5. ROS and SOD, CAT, MDA

### 5.1 ROS Norharman

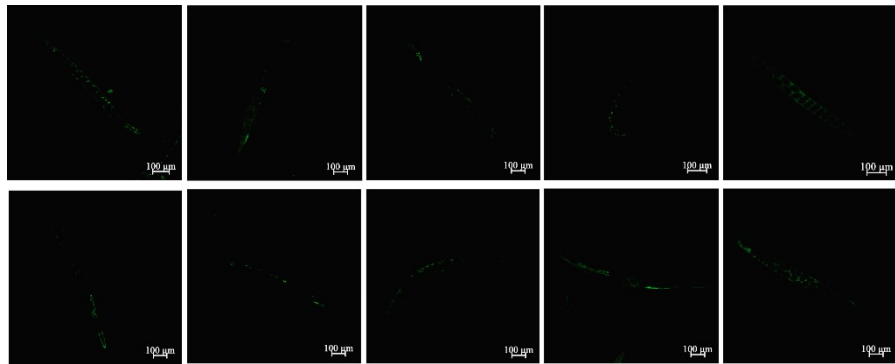

Norharman Control

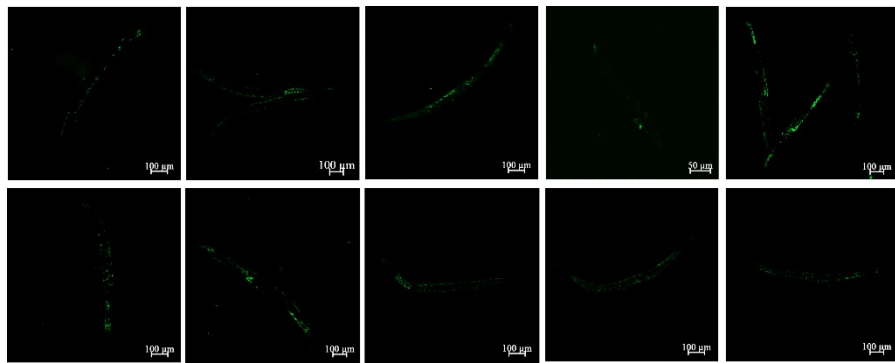

Norharman 0.05

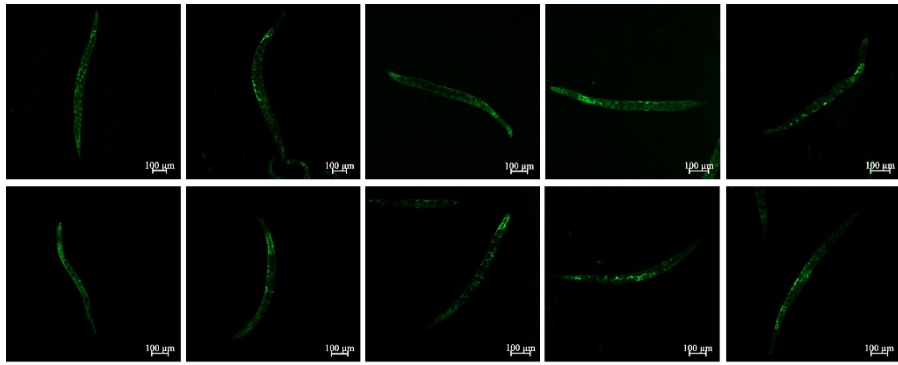

Norharman 5

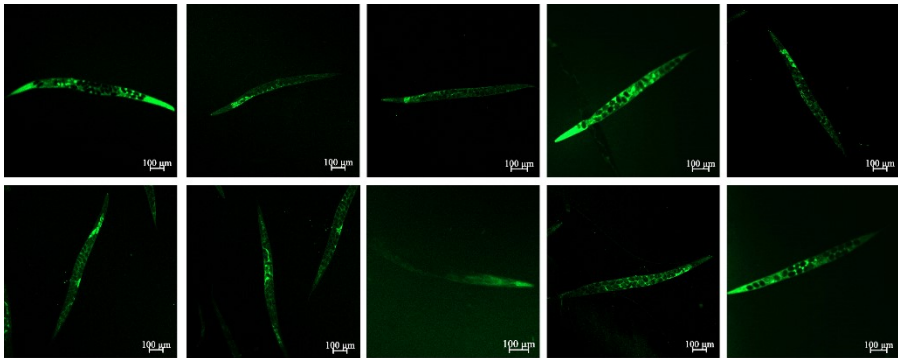

Norharman 10

## 5.2 ROS Harman

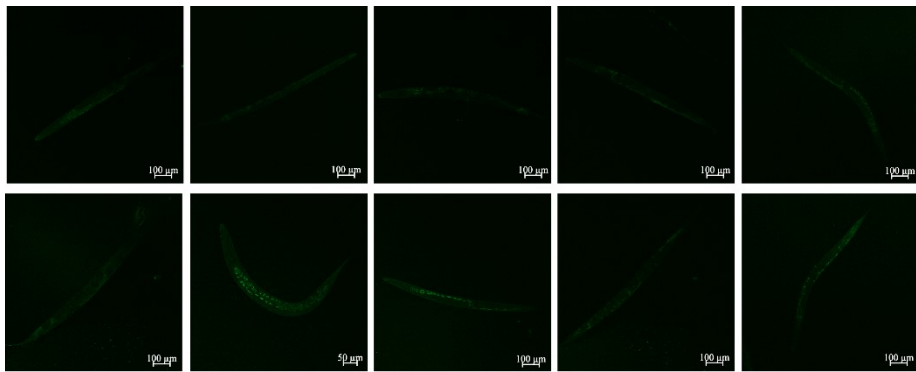

Harman Control

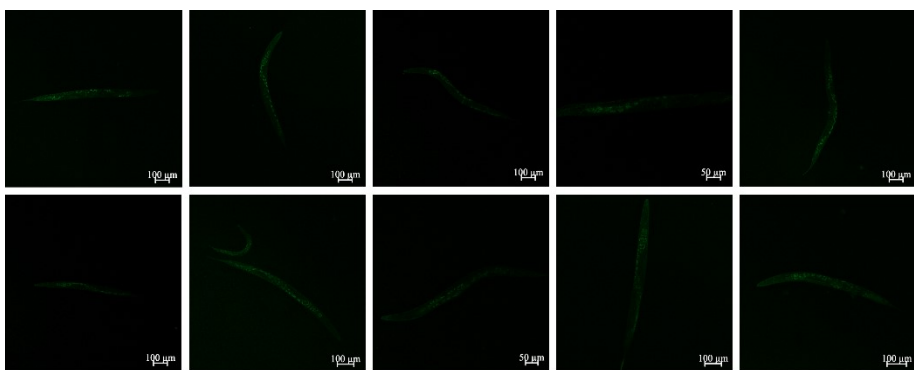

Harman 0.05



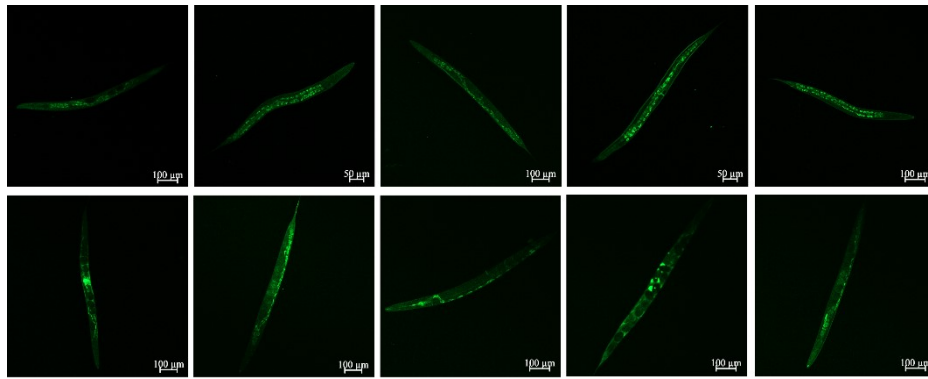

Harman 5

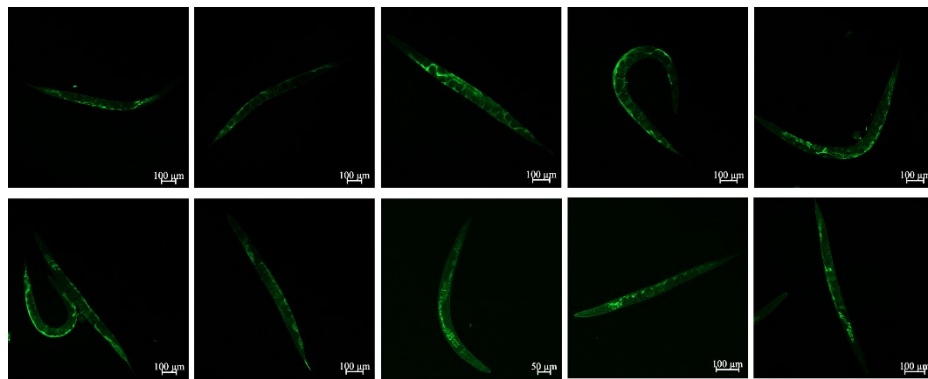

Harman 10

## 5.2 ROS Relative Fluorescent Intensity

| Norharman (% Control) |        |        |         | Harman (% Control) |        |        |        |
|-----------------------|--------|--------|---------|--------------------|--------|--------|--------|
| Control               | 0.05   | 5.00   | 10.00   | Control            | 0.05   | 5.00   | 10.00  |
| 112.53                | 190.46 | 404.90 | 577.11  | 111.20             | 91.95  | 133.12 | 154.09 |
| 101.09                | 253.41 | 459.40 | 788.01  | 115.40             | 59.05  | 152.37 | 158.38 |
| 69.21                 | 155.59 | 452.59 | 595.91  | 87.31              | 59.52  | 161.76 | 142.89 |
| 82.29                 | 274.66 | 440.60 | 716.35  | 78.44              | 88.26  | 162.62 | 176.94 |
| 97.55                 | 263.22 | 401.09 | 762.13  | 121.92             | 112.57 | 143.32 | 210.18 |
| 105.99                | 188.56 | 326.70 | 724.52  | 122.44             | 94.99  | 160.31 | 183.21 |
| 151.50                | 278.75 | 394.28 | 789.65  | 112.10             | 90.53  | 170.60 | 201.18 |
| 131.61                | 191.83 | 589.10 | 1139.78 | 76.38              | 47.39  | 102.84 | 194.27 |
| 61.04                 | 237.06 | 465.67 | 618.80  | 88.56              | 63.68  | 133.80 | 149.24 |
| 87.19                 | 189.65 | 442.23 | 635.97  | 86.24              | 96.96  | 125.40 | 165.15 |

### 5.3 SOD

| Norharman |       |       |       | Harman  |      |      |       |
|-----------|-------|-------|-------|---------|------|------|-------|
| Control   | 0.05  | 5.00  | 10.00 | Control | 0.05 | 5.00 | 10.00 |
| 36.18     | 33.28 | 13.52 | 7.43  | 15.89   | 4.93 | 4.72 | 8.93  |
| 43.69     | 41.07 | 12.52 | 4.94  | 10.49   | 7.83 | 3.33 | 8.29  |
| 36.51     | 37.09 | 9.09  | 14.37 | 11.17   | 6.63 | 5.18 | 0.82  |

### 5.4 CAT

| Norharman |       |      |       | Harman  |      |      |       |
|-----------|-------|------|-------|---------|------|------|-------|
| Control   | 0.05  | 5.00 | 10.00 | Control | 0.05 | 5.00 | 10.00 |
| 23.64     | 43.92 | 2.97 | 2.83  | 26.99   | 3.52 | 2.03 | 10.86 |
| 69.10     | 32.01 | 8.95 | 1.81  | 13.02   | 0.94 | 0.91 | 5.03  |
| 102.70    | 80.10 | 3.57 | 7.65  | 19.78   | 2.99 | 0.99 | 9.45  |

### 5.5 MDA

| Norharman |      |       |        | Harman  |       |       |       |
|-----------|------|-------|--------|---------|-------|-------|-------|
| Control   | 0.05 | 5.00  | 10.00  | Control | 0.05  | 5.00  | 10.00 |
| 1.61      | 2.16 | 15.68 | 433.99 | 7.37    | 15.85 | 3.01  | 81.86 |
| 1.56      | 6.15 | 7.73  | 122.88 | 6.22    | 21.20 | 6.04  | 29.03 |
| 4.63      | 2.24 | 10.59 | 332.43 | 7.42    | 26.63 | 11.84 | 56.68 |

## 6. Neurotransmitters contents and AChE activity

| Ach (mg prot/mL) |        |        |        |         |        |        |        |
|------------------|--------|--------|--------|---------|--------|--------|--------|
| Norharman        |        |        |        | Harman  |        |        |        |
| Control          | 0.05   | 5.00   | 10.00  | Control | 0.05   | 5.00   | 10.00  |
| 137.62           | 233.75 | 215.10 | 750.44 | 369.70  | 167.17 | 153.10 | 227.29 |
| 214.06           | 277.55 | 523.24 | 394.78 | 266.80  | 213.11 | 134.31 | 151.62 |
| 159.65           | 146.47 | 262.12 | 287.40 | 240.07  | 227.70 | 128.10 | 131.92 |
| DA (pg prot/mL)  |        |        |        |         |        |        |        |
| Norharman        |        |        |        | Harman  |        |        |        |
| Control          | 0.05   | 5.00   | 10.00  | Control | 0.05   | 5.00   | 10.00  |
| 0.19             | 0.27   | 0.32   | 0.98   | 0.39    | 0.24   | 0.24   | 0.30   |
| 0.25             | 0.38   | 0.59   | 0.52   | 0.44    | 0.28   | 0.23   | 0.24   |
| 0.16             | 0.17   | 0.37   | 0.40   | 0.33    | 0.29   | 0.23   | 0.24   |
| AChE (U/mg prot) |        |        |        |         |        |        |        |
| Norharman        |        |        |        | Harman  |        |        |        |
| Control          | 0.05   | 5.00   | 10.00  | Control | 0.05   | 5.00   | 10.00  |
| 1.77             | 9.88   | 1.32   | 0.67   | 1.77    | 2.90   | 2.41   | 0.48   |
| 1.77             | 5.58   | 1.16   | 2.27   | 1.77    | 1.92   | 0.58   | 1.03   |
| 1.89             | 1.85   | 1.91   | 1.31   | 1.89    | 2.42   | 1.23   | 1.77   |

## 7. RNA-seq and qRT-PCR

### 7.1 RNA-seq (The level of DEGs (FPKM) on Pathways we were concerned about)

| □                | Control |         |         | Norharman |         |         |
|------------------|---------|---------|---------|-----------|---------|---------|
| <i>gst-14</i>    | 1.8896  | 0.7038  | 1.9477  | 8.3587    | 10.9278 | 9.4045  |
| <i>gst-21</i>    | 2.0592  | 1.8951  | 1.4737  | 3.6602    | 3.5534  | 4.3514  |
| <i>gst-30</i>    | 1.2295  | 1.2956  | 0.6236  | 2.7426    | 2.9765  | 2.5585  |
| <i>gst-35</i>    | 6.1949  | 4.5106  | 6.4306  | 16.3994   | 15.3315 | 13.9362 |
| <i>gst-44</i>    | 7.0359  | 4.2563  | 6.4862  | 14.6406   | 14.5048 | 12.324  |
| <i>ugt-13</i>    | 3.5237  | 3.3139  | 3.2323  | 7.6949    | 7.7272  | 7.8681  |
| <i>cyp-13A12</i> | 8.4902  | 7.4741  | 8.51    | 20.2941   | 17.6544 | 18.8736 |
| <i>cyp-13A8</i>  | 0.5662  | 0.8301  | 0.8875  | 18.6911   | 19.9579 | 22.1917 |
| <i>cyp-35B2</i>  | 1.8027  | 1.1478  | 1.1551  | 0.6548    | 0.8985  | 0.5438  |
| <i>hsp-12.1</i>  | 18.6392 | 17.8507 | 17.4627 | 6.7617    | 11.0061 | 9.8505  |

| □               | Control |         |         | Harman  |         |         |
|-----------------|---------|---------|---------|---------|---------|---------|
| <i>ugt-8</i>    | 2.259   | 2.5128  | 1.2505  | 8.395   | 8.8185  | 8.3992  |
| <i>ugt-13</i>   | 1.1441  | 2.2128  | 1.5414  | 13.485  | 9.8163  | 12.0458 |
| <i>ugt-16</i>   | 1.4474  | 0.6372  | 1.3448  | 5.5235  | 5.2627  | 4.6811  |
| <i>ugt-40</i>   | 0.8796  | 0.7296  | 1.0714  | 1.9468  | 1.4972  | 2.0748  |
| <i>ugt-41</i>   | 3.6846  | 3.6956  | 3.9429  | 14.6894 | 12.6615 | 16.5843 |
| <i>cyp-35A5</i> | 0.2579  | 0.4568  | 0.5242  | 3.1772  | 3.4849  | 2.7162  |
| <i>cyp-35B1</i> | 5.1574  | 4.9063  | 5.0483  | 14.2597 | 15.2779 | 13.6625 |
| <i>cyp-35B2</i> | 0.5037  | 0.3163  | 0.4521  | 4.3655  | 2.9608  | 4.0513  |
| <i>cyp-35B3</i> | 0.1979  | 0.0526  | 0       | 1.0596  | 1.1173  | 0.979   |
| <i>cyp-35C1</i> | 1.4033  | 1.1056  | 1.3207  | 8.8315  | 7.35    | 9.3864  |
| <i>hsp-12.3</i> | 115.868 | 123.782 | 116.292 | 58.6125 | 53.9    | 51.585  |
| <i>hsp-12.6</i> | 169.12  | 146.792 | 172.372 | 84.4433 | 76.0826 | 83.5948 |
| <i>sod-5</i>    | 3.8903  | 7.4303  | 6.289   | 3.6448  | 1.8884  | 2.8888  |

### 7.2 qRT-PCR

| □               | Control |        |        |        |        |        | Norharman |        |        |        |        |        |
|-----------------|---------|--------|--------|--------|--------|--------|-----------|--------|--------|--------|--------|--------|
| <i>cyp-35B2</i> | 0.8562  | 0.5098 | 1.3870 | 2.1024 | 0.5917 | 0.5529 | 0.7460    | 0.5861 | 0.5199 | 0.5918 | 0.2535 | 0.1239 |
| <i>hsp-12.1</i> | 1.7005  | 1.3812 | 0.2717 | 0.2816 | 1.1407 | 1.2243 | 0.2350    | 0.2728 | 0.3018 | 0.2134 | 1.8644 | 2.3018 |
| □               | Control |        |        |        |        |        | Harman    |        |        |        |        |        |
| <i>cyp-35B2</i> | 1.1315  | 0.9127 | 0.2048 | 1.7510 | □      | □      | 1.6860    | 1.8234 | 3.9466 | 1.4556 | □      | □      |
| <i>sod-5</i>    | 1.3495  | 0.7477 | 0.9028 | □      | □      | □      | 0.2523    | 0.6123 | 0.6454 | □      | □      | □      |
| <i>hsp-12.3</i> | 1.1303  | 1.3858 | 0.9698 | 1.0365 | 0.7910 | 0.6867 | 0.5021    | 0.3618 | 0.6105 | 0.5311 | 1.6056 | 1.7680 |
| <i>hsp-12.6</i> | 1.2639  | 1.1438 | 1.0988 | 1.0280 | 0.4655 | □      | 0.5099    | 0.5658 | 0.6064 | 0.4918 | 1.9376 | □      |
