# Supplementary material for: β-Carbolines norharman and harman change neurobehavior causing neurological damage inCaenorhabditis elegans
Source: Royal Society of Chemistry journal article supplement (doi:10.1039/d3fo03732k), 2023-01-01
Supplement: d3fo03732k2.pdf [file d3fo03732k2.pdf]

1  
2  
3  
4  
5  
6  
7  
8  
9  
10  
11  
12  
13  
14  
15  
16  
17  
18  
19  
20  
21  
22

## Supplementary Information

### **$\beta$ -Carbolines Norharman and Harman change neurobehavior causing neurological damage in *Caenorhabditis elegans***

Luyao Zhang <sup>a,1</sup>, Jialu Liu <sup>a,1</sup>, Bufan Xu <sup>a</sup>, Di Wu <sup>b</sup>, Yongning Wu <sup>a,c</sup>,  
Guoliang Li <sup>a,\*</sup>

<sup>a</sup> School of Food Science and Engineering, Shaanxi University of Science and  
Technology, Xi'an, 710021, China

<sup>b</sup> Institute for Global Food Security, School of Biological Sciences, Queen's University  
Belfast, Belfast, BT9 5DL, UK

<sup>c</sup> NHC Key Laboratory of Food Safety Risk Assessment, Food Safety Research Unit  
(2019RU014) of Chinese Academy of Medical Science, China National Center for Food  
Safety Risk Assessment, Beijing 100021, China

<sup>1</sup> Luyao Zhang, Jialu Liu contribute to the manuscript equally.

#### AUTHOR INFORMATION

E-mail: 61254368@163.com (Guoliang Li)

#### Document prepared:

Number of pages: 15; number of Texts: 6; number of Figures: 7; number of Tables: 1.

23 **Text S1. Physiological indicators**

24 Nematodes were maintained at Nematode Growth Medium (NGM medium: 3 g  
25 NaCl, 2.5 g tryptone and 17 g agar in 1 L distilled water, using after autoclaving 30  
26 min) or K-medium (2.98 g NaCl and 2.386 g KCl in 1 L distilled water, using after  
27 autoclaving 30 min) with *Escherichia coli* OP50 as food resources at 20 °C (Strange et  
28 al., 2007). The NGM medium on which the nematodes had grown and propagated for  
29 several days was cut with a sterilized medicine spoon, and then the cut agar block was  
30 pasted on the new NGM medium to propagate the nematodes (Li et al., 2019).

31 A lysis solution (5 % NaClO and 5 M NaOH) was utilized to obtain a synchronized  
32 population. To prepare age-synchronized animals, a large number of nematodes in the  
33 spawning period were washed down from NGM medium with M9 buffer to precipitate  
34 freely, and the excess M9 buffer was absorbed, the lysate was added 1:1, make it fully  
35 cracked, centrifuged and washed twice to obtain the precipitated eggs. Washed with  
36 M9 buffer repeatedly three times to entirely remove the components of the cracking  
37 solution. Finally, the eggs were transferred to NGM medium with fresh OP50 as food,  
38 cultured at 20 °C. L1 larval stage was obtained at about 14h after synchronization, and  
39 L4 larval stage was obtained at about 48h (Strange et al., 2007).

40

41 **Text S2. Physiological indicators**

42 **Measurements of physiological indicators, including body length and width,**  
43 **head thrashes, body bends, and pharyngeal pumping.**

44 The growth of nematodes was evaluated by body length and body width. After  
45 exposure, *C. elegans* were transferred to slides and the length and width were measured  
46 under the stereomicroscope equipped with a camera (Zeiss stemi305) after being killed  
47 by heat (20 worms/treatment) (Zhou et al., 2016). Locomotion behaviors were assessed  
48 by head thrashes and body bends. A head thrash is defined as a change in the direction  
49 of bending at the middle body. Assuming the nematodes only moved along the x-axis,  
50 a body bend is regarded as a change in the direction of nematodes corresponding to the  
51 posterior bulb of the pharynx along the y-axis. To assay head thrashes and body bends,  
52 the test nematodes were rinsed thoroughly with M9 buffer and transferred to another  
53 NGM plate without OP50. Allow its behavior to stabilize for 1 min, and then place it  
54 under a stereoscopic microscope to observe the number of head swings and body bends  
55 after its behavior recovers. head thrashes were counted for 1 min and body bends were  
56 counted for the 20s with the stereomicroscope by eye. Each behavioral analysis  
57 examined fifteen nematodes per treatment (Wu et al., 2013).

58 The pharyngeal pumping rate was determined as previously described (Liu et al.,  
59 2013), nematodes after the end of exposure were collected, and the tested nematodes  
60 were washed three times with sterile K buffer, put on OP50 coated medium and then  
61 incubated at 20°C for 2h to enter a stable fed state. The pharyngeal pumping frequency  
62 (the beating of the nematode's pharynx back and forth scored as a pumping pharynx

63 once) within the 20s was observed and recorded using the stereomicroscope, fifteen  
64 nematodes per treatment were examined.

### 65 **Text S3. Foraging behavior**

66 Before the test, *E. coli* OP50 was cultivated within a 0.5 cm radius from the center  
67 in a 9 cm agar medium, and 1  $\mu$ l of 60  $\mu$ M levamisole solution, which played an  
68 anesthetic effect, was applied to the OP50 colony. Next, the exposed nematodes were  
69 washed three times with M9 buffer, and about 40 nematodes were transferred to the  
70 starting position (4 cm away from the *E. coli* center) of a test Petri dish (**Fig. 2A**). Each  
71 test was replicated 4 times. After 2, 4, 8, and 24 hours of incubation at 20°C, nematode  
72 numbers in OP50 exposed colonies were counted in each plate using the  
73 stereomicroscope. The foraging ability of *C. elegans* was derived by counting the  
74 percentage of the number of *C. elegans* in contact with the food source to the total  
75 number of *C. elegans* in the test Petri dish.

76

77 **Text S4. Chemotaxis assay**

78 Before the test, prepare the Petri dishes: A typical 9 cm Petri dish was used for  
79 each experimental group to evaluate chemotaxis behavior, and a piece of NaCl agar  
80 block (100 mM) was placed 3 cm from the center (**Fig. 2B point N**), and the  
81 corresponding opposite position was set as control (without NaCl) (**Fig. 2B point C**).  
82 The Petri dishes put in the agar block were stored overnight at 4 °C to obtain the  
83 concentration gradient of NaCl. Fifteen minutes before the assay, the NaCl agar was  
84 removed and 1 µL levamisole solution was applied to each of the two test points.  
85 Approximately 50 nematodes were placed at the starting position (**Fig. 2B point S**).

86 The chemotaxis index (CI) was obtained using the formula: (the number of *C.*  
87 *elegans* in the NaCl-containing part/the number in the NaCl-free part)/the total number  
88 of *C. elegans* on test Petri dishes). A positive CI indicated an attraction to the salt, and  
89 a negative CI indicated an aversion, as described in the literature. Every concentration  
90 was replicated four times (Wu et al., 2015).

91

92 **Text S5. Determination of ROS accumulation, SOD, CAT activity and MDA**  
93 **content**

94 Experimental worms were washed three times with M9 buffer and moved into 24-  
95 well plates that contained 50  $\mu\text{M}$  of CM-H<sub>2</sub>DCFDA for 1 h at 20 °C, and then worms  
96 were washed with M9 buffer and anesthetized by 1  $\mu\text{L}$  60  $\mu\text{M}$  levamisole solution and  
97 transferred onto a glass slide. The fluorescence images were obtained by laser confocal  
98 fluorescence microscope (Zeiss LSM800) under the excitation at 485 nm. For each  
99 group, 15 nematodes were photographed. Fluorescence intensity was analyzed with  
100 ImageJ.

101 After exposure, the nematodes were harvested and washed with M9 buffer, then  
102 transferred into Ep tubes. The suspension was homogenized by vortex grinding,  
103 followed by centrifugation at 8000 rpm for 10 min at 4 °C. The supernatant was  
104 collected to determine the total protein, the total superoxide dismutase (SOD) and  
105 catalase (CAT) activities and the content of malondialdehyde (MDA) according to the  
106 kit instructions, respectively. The SOD, CAT and content of MDA were normalized by  
107 protein content and represented as U/mg prot, U/mg prot and mg prot/ml, respectively.  
108 Each indicator was repeated three times for each concentration. SOD, CAT activities  
109 and the content of MDA in all tissues were measured using the assay kit (Nanjing Jian  
110 Cheng Bioengineering Institute), the total protein assay kit (BCA method) (Nanjing  
111 Jian Cheng Bioengineering Institute).

112

113 **Text S6. qRT-PCR method**

114 The RNA of nematodes was extracted by TRNzol (Tiangen, Beijing, China) and  
115 reverse-transcribed to obtain cDNA using FastKing gDNA Dispelling RT SuperMix  
116 (Tiangen, Beijing, China). The expression of tested genes was examined using MyGo  
117 Pro (IT-IS Life Science) with a SuperReal Premix Plus (SYBR Green) kit (Tiangen,  
118 Beijing, China). Gene expression was analyzed by the  $2^{-\Delta\Delta Ct}$  method and actin-1  
119 mRNA was used to normalize the expression level. For the analysis of each gene, three  
120 replicates at least were measured per concentration. The designed primers were shown  
121 in **Table S1**.

122

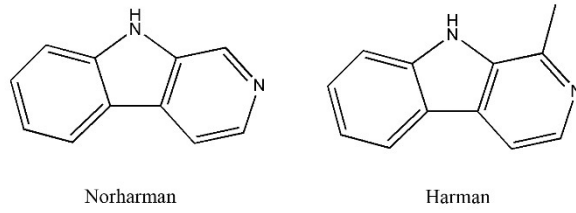

123

124

**Fig. S1.** The chemical structures of Norharman and Harman

125

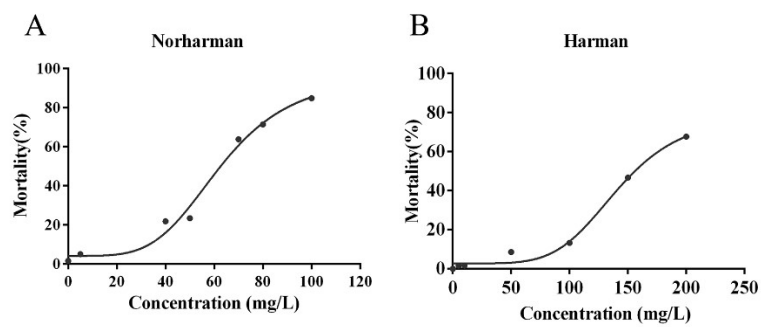

126

127

**Fig. S2.** Dosage-mortality curve after acute exposure. (A) Norharman. (B) Harman.

128

129

130

131

132

133



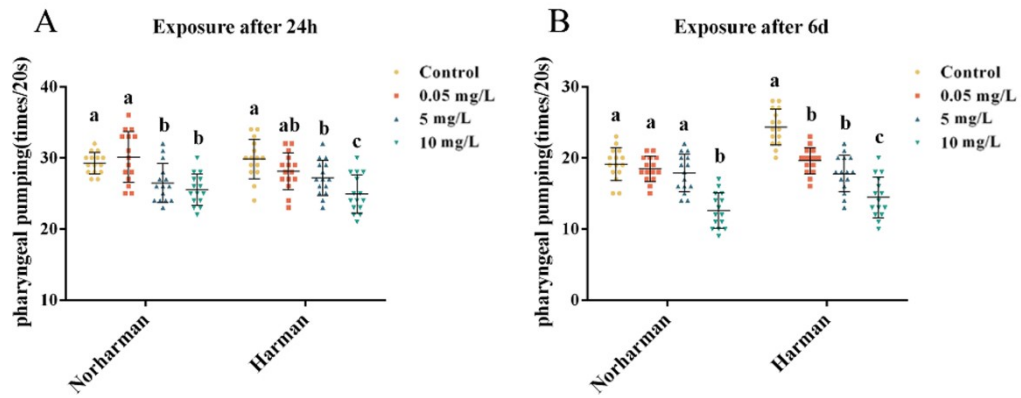

134 **Fig. S3.** Effects on *C. elegans* pharyngeal pumping frequency after exposure. (A) after 24h exposure  
 135 of Norharman and Harman. (B) after 6d exposure to Norharman and Harman. Data are presented as  
 136 the mean  $\pm$  SD. Significance ( $p < 0.05$ ) among groups is denoted by different letters.

137

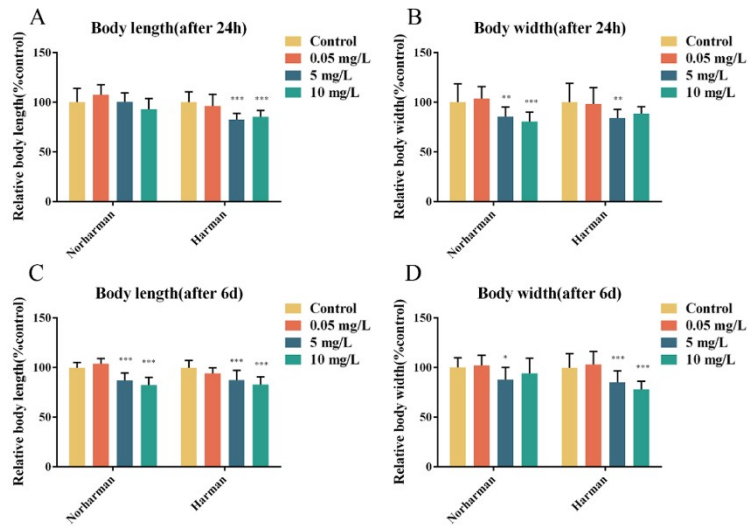

138 **Fig. S4.** Effects on *C. elegans* body length and body width after exposure to Norharman and  
 139 Harman. (A) The body length of the nematodes after 24h. (B) The body width of the nematodes  
 140 after 24h. (C) The body length of the nematodes after 6d. (D) The body width of the nematodes  
 141 after 6d. Each group randomly selected 20 worms for measurement. Data are presented as the  
 142 mean  $\pm$  SD. \*P < 0.05; \*\*P < 0.01; \*\*\*P < 0.001.

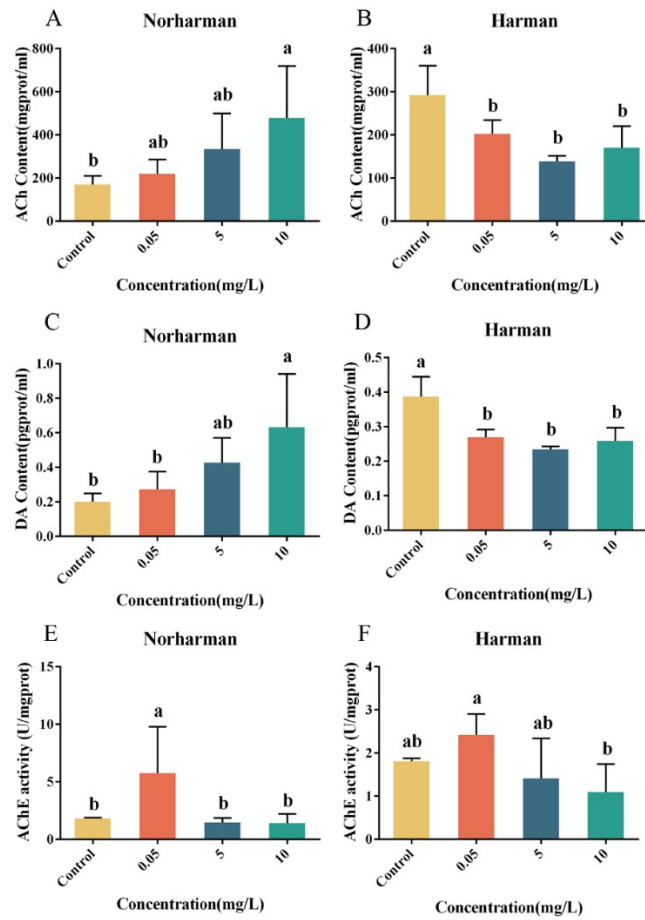

143

144 **Fig. S5.** Effects on the content of ACh, DA and AChE activity after exposure. (A, B)  
 145 the content of ACh in *C. elegans* after exposure to Norharman and Harman. (C, D) the  
 146 content of DA in *C. elegans* after exposure to Norharman and Harman. (E, F) AChE  
 147 activity in *C. elegans* after exposure to Norharman and Harman. Data are presented as  
 148 the mean  $\pm$  SD. Significance ( $p < 0.05$ ) among groups is denoted by different letters.

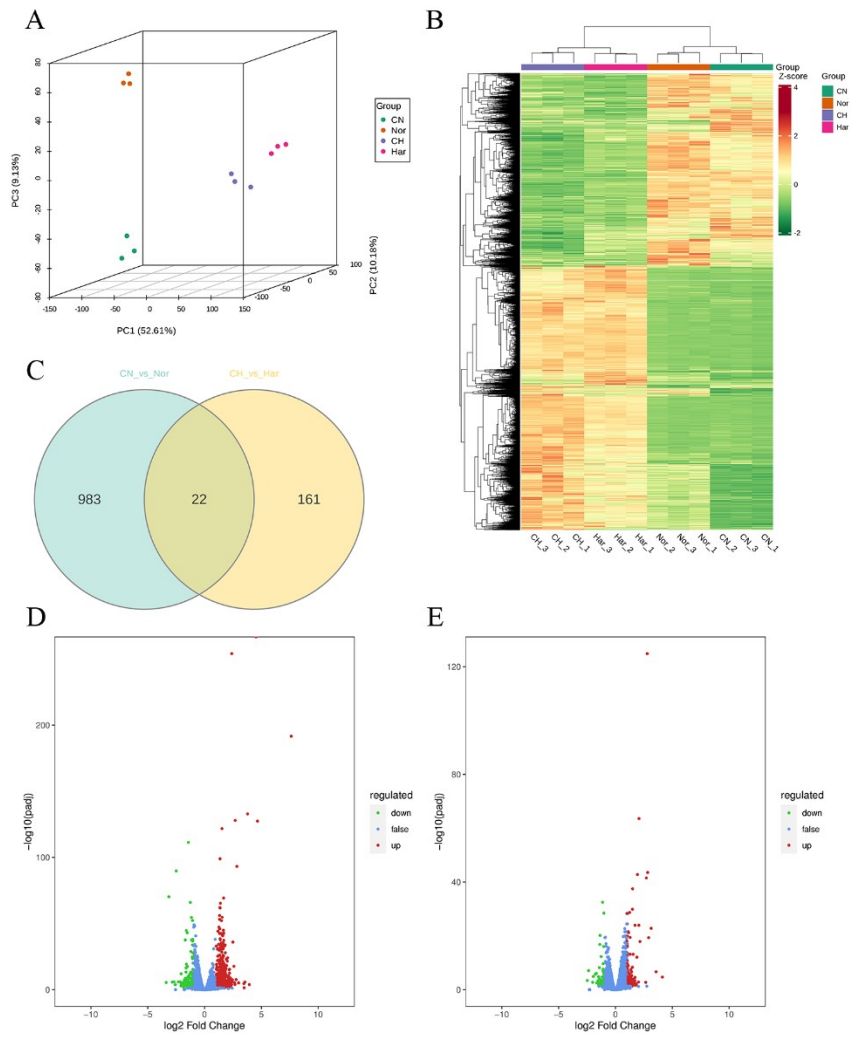

149 **Fig. S6.** RNA-Seq analysis results. (A) principal component analysis (PCA). (B)  
 150 Differential gene clustering heat map. (C) Venn diagram of the differential genes in  
 151 different groups. (D) Differential gene volcanic map of exposure of Norharman. (E)  
 152 Differential gene volcanic map of exposure of Harman. (Nor and Har represent  
 153 Norharman and Harman groups, respectively, CN represents the control group for Nor,  
 154 and CH represents the control group for Har).

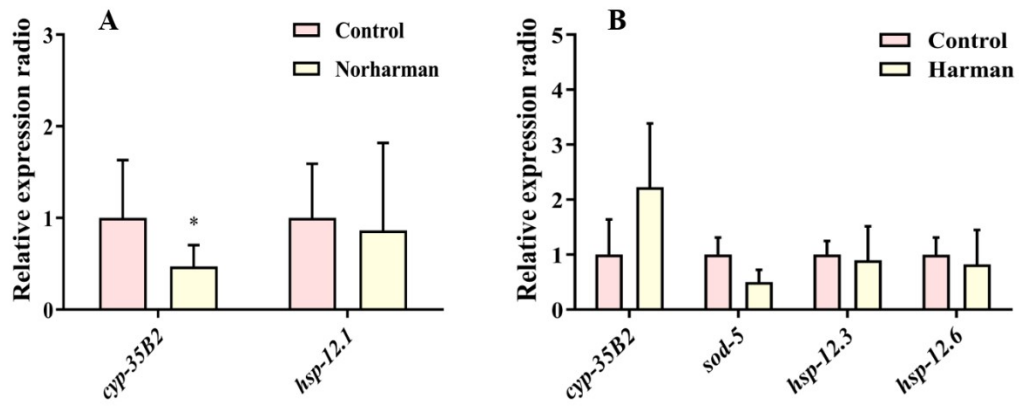

155

156 **Fig. S7.** Validation of gene expression patterns using qRT-PCR.

157 **Table S1. Primer for qRT-PCR**

| Primer          |    | Primer sequence (5'-3')   |
|-----------------|----|---------------------------|
| <i>Actin-1</i>  | fw | AGAAGAGCACCCAGTCCTCC      |
|                 | re | GAAGCGTAGAGGGAGAGGAC      |
| <i>cyp-35B2</i> | fw | CGATTTCTTTGACCTTGCCGTTGG  |
|                 | re | AGTGAATAAGTCTGAAGCCGAGTCC |
| <i>hsp-12.1</i> | fw | ATTACAACCTGACTCGGCGGCTTC  |
|                 | re | GGTCCAAAGAATCCAGCATCAAGTC |
| <i>sod-5</i>    | fw | TGCCAATGCCGTTCTTCCACAG    |
|                 | re | AACAGTTCCGAAGACAGCAGTTCC  |
| <i>hsp-12.3</i> | fw | GGCTCACACAACCAAAGACGATAAG |
|                 | re | TTCCGCTGCCATCCAACCTGC     |
| <i>hsp-12.6</i> | fw | CAGTGATGGCTGACGAAGGAACC   |
|                 | re | TGGGAGGAAGTTATGGGCTTCTAGG |

159 Reference:

160 Li, Y., Chu, Q., Liu, Y., Ye, X., Jiang, Y., Zheng, X., 2019. Radix Tetrastigma  
161 flavonoid ameliorates inflammation and prolongs the lifespan of *Caenorhabditis*  
162 *elegans* through JNK, p38 and Nrf2 pathways. *Free Radical Research* 53, 562-  
163 573.

164 Liu, S., Saul, N., Pan, B., Menzel, R., Steinberg, C.E., 2013. The non-target organism  
165 *Caenorhabditis elegans* withstands the impact of sulfamethoxazole.  
166 *Chemosphere* 93, 2373-2380.

167 Strange, K., Christensen, M., Morrison, R., 2007. Primary culture of *Caenorhabditis*  
168 *elegans* developing embryo cells for electrophysiological, cell biological and  
169 molecular studies. *Nat Protoc* 2, 1003-1012.

170 Wu, Q., Nouara, A., Li, Y., Zhang, M., Wang, W., Tang, M., Ye, B., Ding, J., Wang,  
171 D., 2013. Comparison of toxicities from three metal oxide nanoparticles at  
172 environmental relevant concentrations in nematode *Caenorhabditis elegans*.  
173 *Chemosphere* 90, 1123-1131.

174 Wu, T., He, K., Zhan, Q., Ang, S., Ying, J., Zhang, S., Zhang, T., Xue, Y., Tang, M.,  
175 2015. MPA-capped CdTe quantum dots exposure causes neurotoxic effects in  
176 nematode *Caenorhabditis elegans* by affecting the transporters and receptors of  
177 glutamate, serotonin and dopamine at the genetic level, or by increasing ROS,  
178 or both. *Nanoscale* 7, 20460-20473.

179 Zhou, D., Yang, J., Li, H., Cui, C., Yu, Y., Liu, Y., Lin, K., 2016. The chronic toxicity  
180 of bisphenol A to *Caenorhabditis elegans* after long-term exposure at
